# Supplementary material
Source: Springer Nature journal article supplement (http://springermedizin.de/resource/supplementary/12906_2013_1618_MOESM1_ESM.pdf/9522712)
Supplement: MOESM1 [file 9522712]

# CONSORT Flowchart

## Enrollment

Assessed for eligibility (n=153)

Excluded (n=105)  
No epileptiform discharges in EEG examinations  
Declined to participate (n=0)

Randomized (n=48)

## Allocation

Allocated to Treatment (n=24)  
Received allocated music (n=24)  
Did not receive allocated music (n=0)

Allocated to Control (n=24)

## Follow-up

Lost to follow (n=0)  
Discontinued intervention (n=2)

Lost to follow-up (n=0)

## Analysis

Analyzed (n=22)  
Excluded form analysis (n=2): 2 subjects  
listened to music less than six months

Analyzed (n=24)  
Excluded form analysis (n=0)
